# Supplementary material for: PhyloPattern: regular expressions to identify complex patterns in phylogenetic trees
Source: Springer Nature journal article supplement (doi:10.1186/1471-2105-10-298), 2009-09-19
Supplement: 12859_2009_3028_MOESM7_ESM.pdf [file 12859_2009_3028_MOESM7_ESM.pdf]

| Pattern syntax                  | Pattern schema                                                                     | Description                                                                                                            | Result                                            |
|---------------------------------|------------------------------------------------------------------------------------|------------------------------------------------------------------------------------------------------------------------|---------------------------------------------------|
| [[], TagList]                   |     | a node with no child                                                                                                   | the matching leaf                                 |
| [[Pattern1, Pattern2], TagList] |   | the node must match to an internal node, with two child patterns that must match to the internal node's children       | the matching subtree                              |
| @(Pattern)                      |   | the node must contain a subtree that matches with Pattern                                                              | the subtree matching with Pattern                 |
| \$(Pattern)                     |   | the node must contain a subtree, even partially damaged, that matches with Pattern                                     | the “damaged” subtree matching with Pattern       |
| &(PatternList)                  |   | a rake: each pattern of the given list matches with a subtree of the node and these patterns partition the entire tree | the tree partitioned by the matching pattern list |
| #(LeafList)                     |  | the node's leaf list is equivalent to the given list                                                                   | the subtree partitioned by the matching leaf list |
